# Supplementary material
Source: PubMed Central journal article supplement (PMC3631687)
Supplement: 1220179110_pnas.201220179SI.pdf [file 1220179110_pnas.201220179SI.pdf]

# Supporting Information

Malmersjö et al. 10.1073/pnas.1220179110

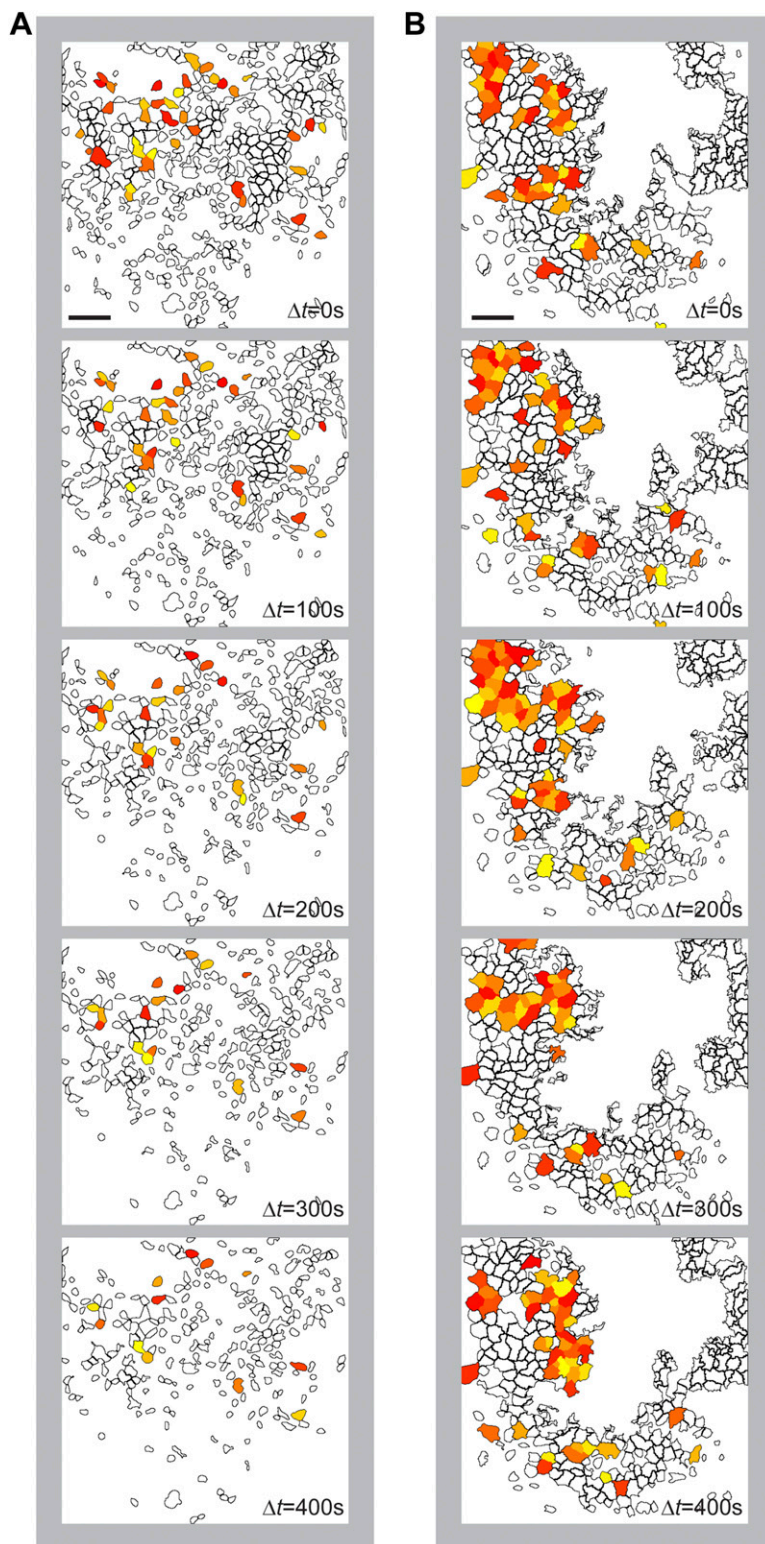

**Fig. S1.** Related to Fig. 1. (A and B) Proliferating mouse ES cells exhibited sparse and disperse spontaneous calcium ion ( $\text{Ca}^{2+}$ ) activity (A), whereas neural progenitor cells exhibited vivid and clustered spontaneous  $\text{Ca}^{2+}$  activity (B). Cells with a cytosolic  $\text{Ca}^{2+}$  concentration 25% above baseline are pseudocolored (hot) at indicated time points. (Scale bars, 50  $\mu\text{m}$ .)

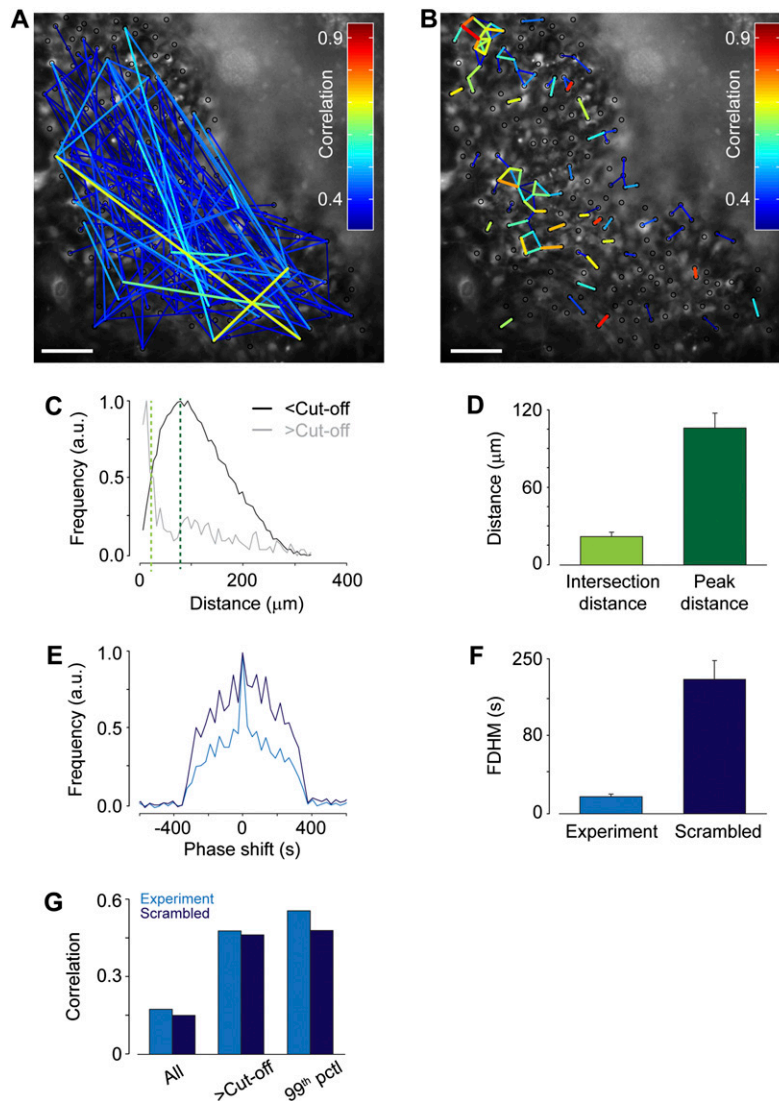

**Fig. S2.** Related to Fig. 2. (A) Network plot of cross-correlation coefficients from time-shifted scrambled  $\text{Ca}^{2+}$  recordings on neural progenitor cells greater than cutoff (color coded as indicated). (B) Network plot of cross-correlation coefficients from  $\text{Ca}^{2+}$  recordings of neural progenitor cells greater than cutoff (color coded as indicated) and cell-to-cell distances shorter than  $22.1 \mu\text{m}$ . (Scale bars,  $50 \mu\text{m}$ .) (C) Plot of distance distribution for the experiment depicted in Fig. 2A showing correlation coefficients less than (black trace) and greater than (gray trace) the cutoff of 0.39. (D) Mean intersection value (light green bar) and mean peak value (dark green bar) of distance distributions from six experiments, indicated in C by light green and dark green lines, respectively. (E) Cross-correlation analysis of  $\text{Ca}^{2+}$  activity using time lag for six experiments shows significantly shorter phase-shift for experimental data (light blue) compared with scrambled signals (dark blue). (F) Quantification of full duration at half maximum of phase shift from experimental data and scrambled data. (G) Statistical analyses of correlation coefficients derived from in vivo  $\text{Ca}^{2+}$  imaging of whole embryo and scrambled data. The entire data set (All), and filtered data sets greater than cutoff ( $>\text{Cut-off}$ ) or the 99th percentile (99<sup>th</sup> pctl) are presented. Values are mean  $\pm$  SEM.

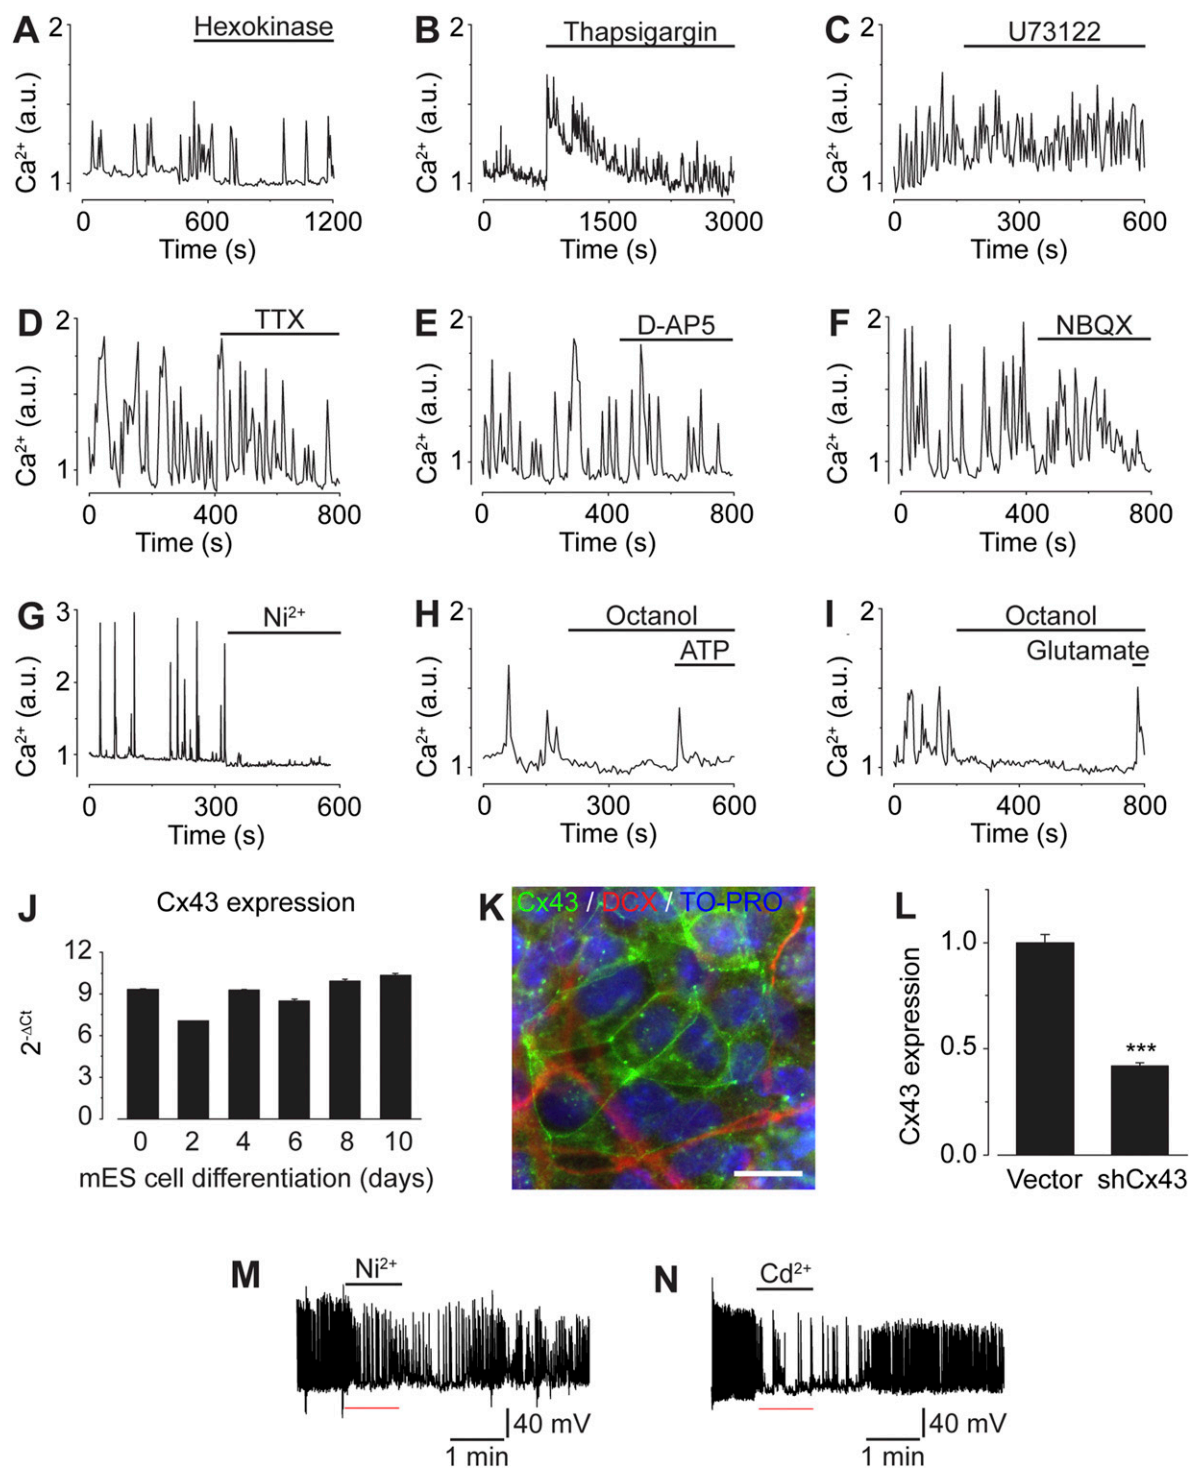

**Fig. S3.** Related to Fig. 4. (A–F) Hexokinase (10 U/mL) for consumption of extracellular ATP (A), thapsigargin (1  $\mu$ M) for depleting intracellular endoplasmic reticulum Ca<sup>2+</sup> stores (B), U73122 (5  $\mu$ M) for inhibiting phospholipase C (C), TTX (3  $\mu$ M) for voltage-dependent sodium channel blockade (D), D(-)-2-amino-5-phosphonovaleric acid (D-AP5; 100  $\mu$ M) for NMDA receptor blockade (E), and 2,3-dihydroxy-6-nitro-7-sulfamoyl-benzo[f]quinoxaline (NBQX; 50  $\mu$ M) for AMPA receptor inhibition (F), all failed to abolish spontaneous Ca<sup>2+</sup> activity in neural progenitor cells. (G) Voltage-gated Ca<sup>2+</sup> channel blockade with Ni<sup>2+</sup> (50  $\mu$ M) inhibited spontaneous Ca<sup>2+</sup> activity. (H and I) Cells treated with octanol (1 mM) were still responsive with Ca<sup>2+</sup> transients following treatment with ATP (10  $\mu$ M) (H) or glutamate (100  $\mu$ M) (I). (J) Real-time PCR analysis of *Cx43* expression relative to the housekeeping gene (TATA-box binding protein) in differentiating neural progenitors. (K) Immunocytochemistry of neural progenitor cells (day 8) stained for *Cx43* and the neural progenitor marker doublecortin (DCX). Nuclei were counterstained with TO-PRO-3. (Scale bar, 20  $\mu$ m.) (L) Real-time PCR analysis of *Cx43* in mouse embryonic NIH 3T3 fibroblasts transfected with empty vector (Vector) or shRNA/*Cx43* (shCx43) for 48 h. (M and N) Spontaneous electrical activity in neural progenitor cells was suppressed by blocking voltage-gated Ca<sup>2+</sup> channels with Ni<sup>2+</sup> (50  $\mu$ M) (M) or Cd<sup>2+</sup> (0.1 mM) (N). Line under name of applied drug indicates time of drug administration. Values are mean  $\pm$  SEM; \*\*\**P* < 0.001.

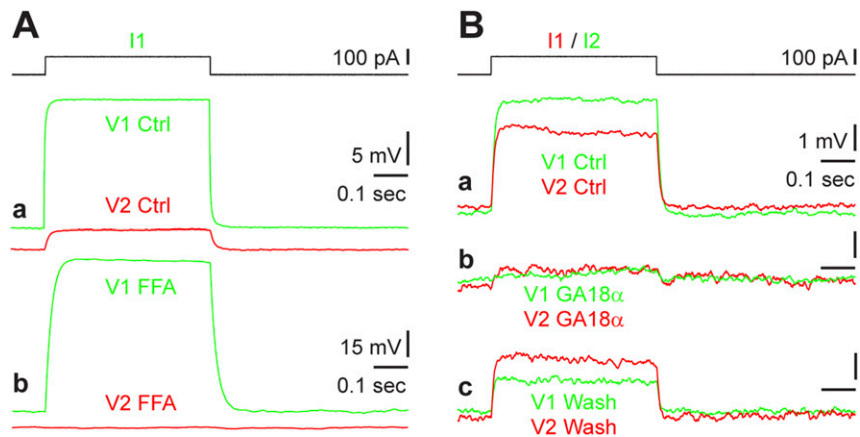

**Fig. S4.** Related to Fig. 5. (A, a) Injecting a 100-pA pulse (I1) into one cell (E1) revealed electrical coupling with a neighboring cell (E2). (A, b) Adding flufenamic acid (FFA; 100  $\mu$ M) to the medium blocked the electrical coupling between cells. Note the increased input resistance of the recorded cells, as evidenced by the larger voltage response in cell 1 (green traces: V1 control vs. V1 FFA). (B, a) Injecting a 100 pA-pulse into one cell revealed electrical coupling with a neighboring cell (I1 to V2, red trace), and vice versa (I2 to V1, green trace). (B, b) Adding 18 $\alpha$ -glycyrrhetic acid (GA18 $\alpha$ ; 50  $\mu$ M) to the medium blocked the electrical coupling between cells, and vice versa. (B, c) After washing out GA18 $\alpha$ , the electrical coupling recovered.

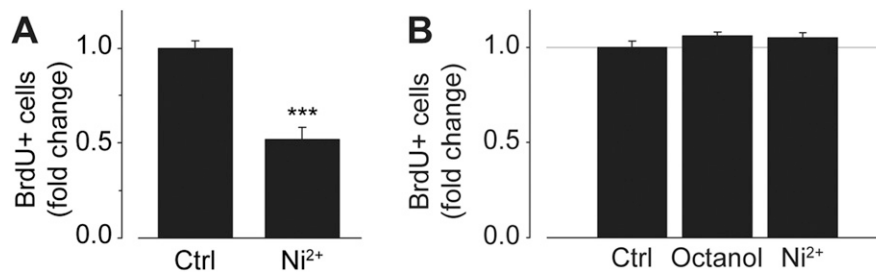

**Fig. S5.** Related to Fig. 6. (A and B) Quantification of BrdU-positive neural progenitor cells (A) and proliferating ES cells (B) treated with Ni<sup>2+</sup> (50  $\mu$ M) or octanol (1 mM) for 7 h normalized to control. Values are mean  $\pm$  SEM; \*\*\* $P$  < 0.001.

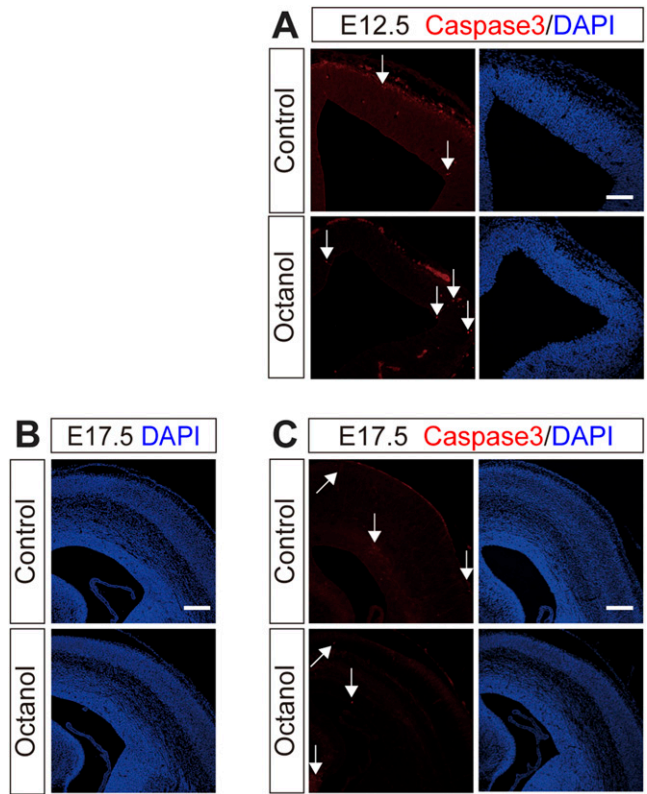

**Fig. S6.** Related to Fig. 7. (A) Immunohistochemistry of cleaved Caspase-3 in embryonic day 12.5 (E12.5) brain treated with control or octanol for 7 h. Nuclei were counterstained with DAPI (blue). (B) Cortical thickness in brains from E17.5 animals injected with control or octanol 5 d earlier at E12.5. (C) Immunohistochemistry of cleaved Caspase-3 in E17.5 brain injected with control or octanol 5 d earlier at E12.5. Nuclei were counterstained with DAPI (blue). (Scale bars, 200 μm.)

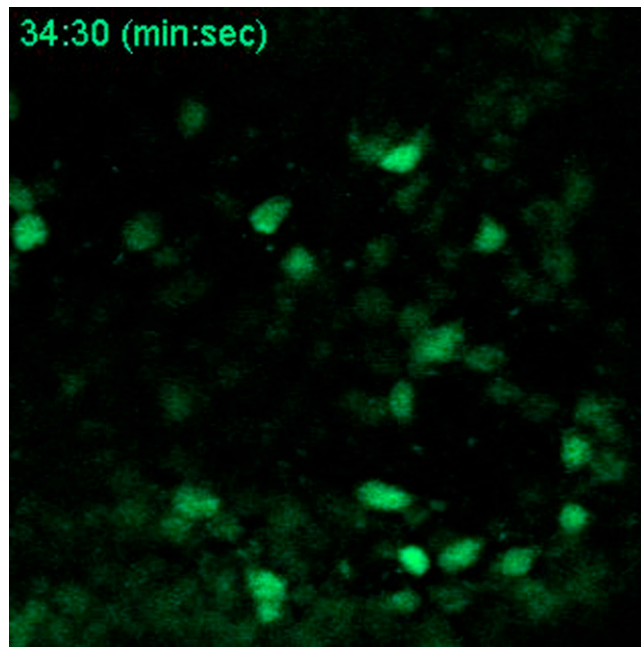

**Movie S1.** In vivo imaging of spontaneous  $\text{Ca}^{2+}$  activity in mouse embryo brain at E9.5. Related to Fig. 5. Movie showing spontaneous  $\text{Ca}^{2+}$  activity in in-vivo experiments on whole-mouse embryos at E9.5 loaded with Fluo-4/AM and time-lapse recording every 10 s. Frame size is  $260 \times 260 \mu\text{m}$ .

[Movie S1](#)
